# Supplementary material
Source: Springer Nature journal article supplement (https://www.springermedizin.de/resource/supplementary/12984_2009_237_MOESM1_ESM.pdf/9605592)

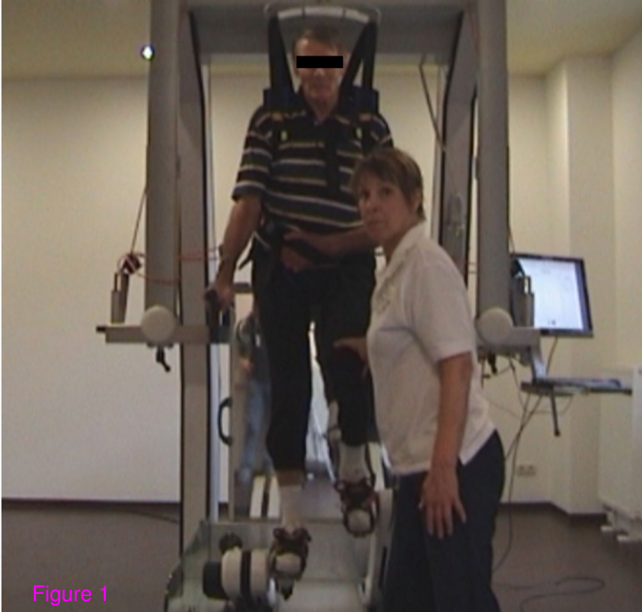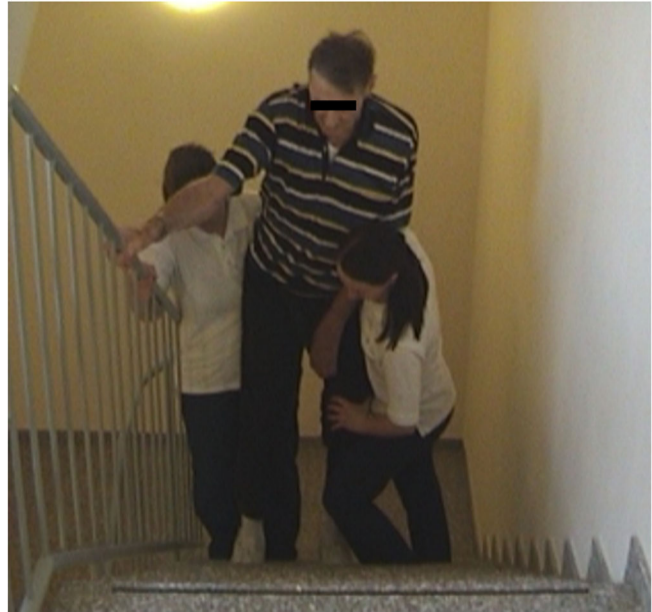

Figure 1

Supplement: MOESM1 [file 9605592]
